# Supplementary material
Source: MDPI journal article supplement (https://www.mdpi.com/2306-5338/9/11/197)
Supplement: s1 [file s1]

## Supplementary Information

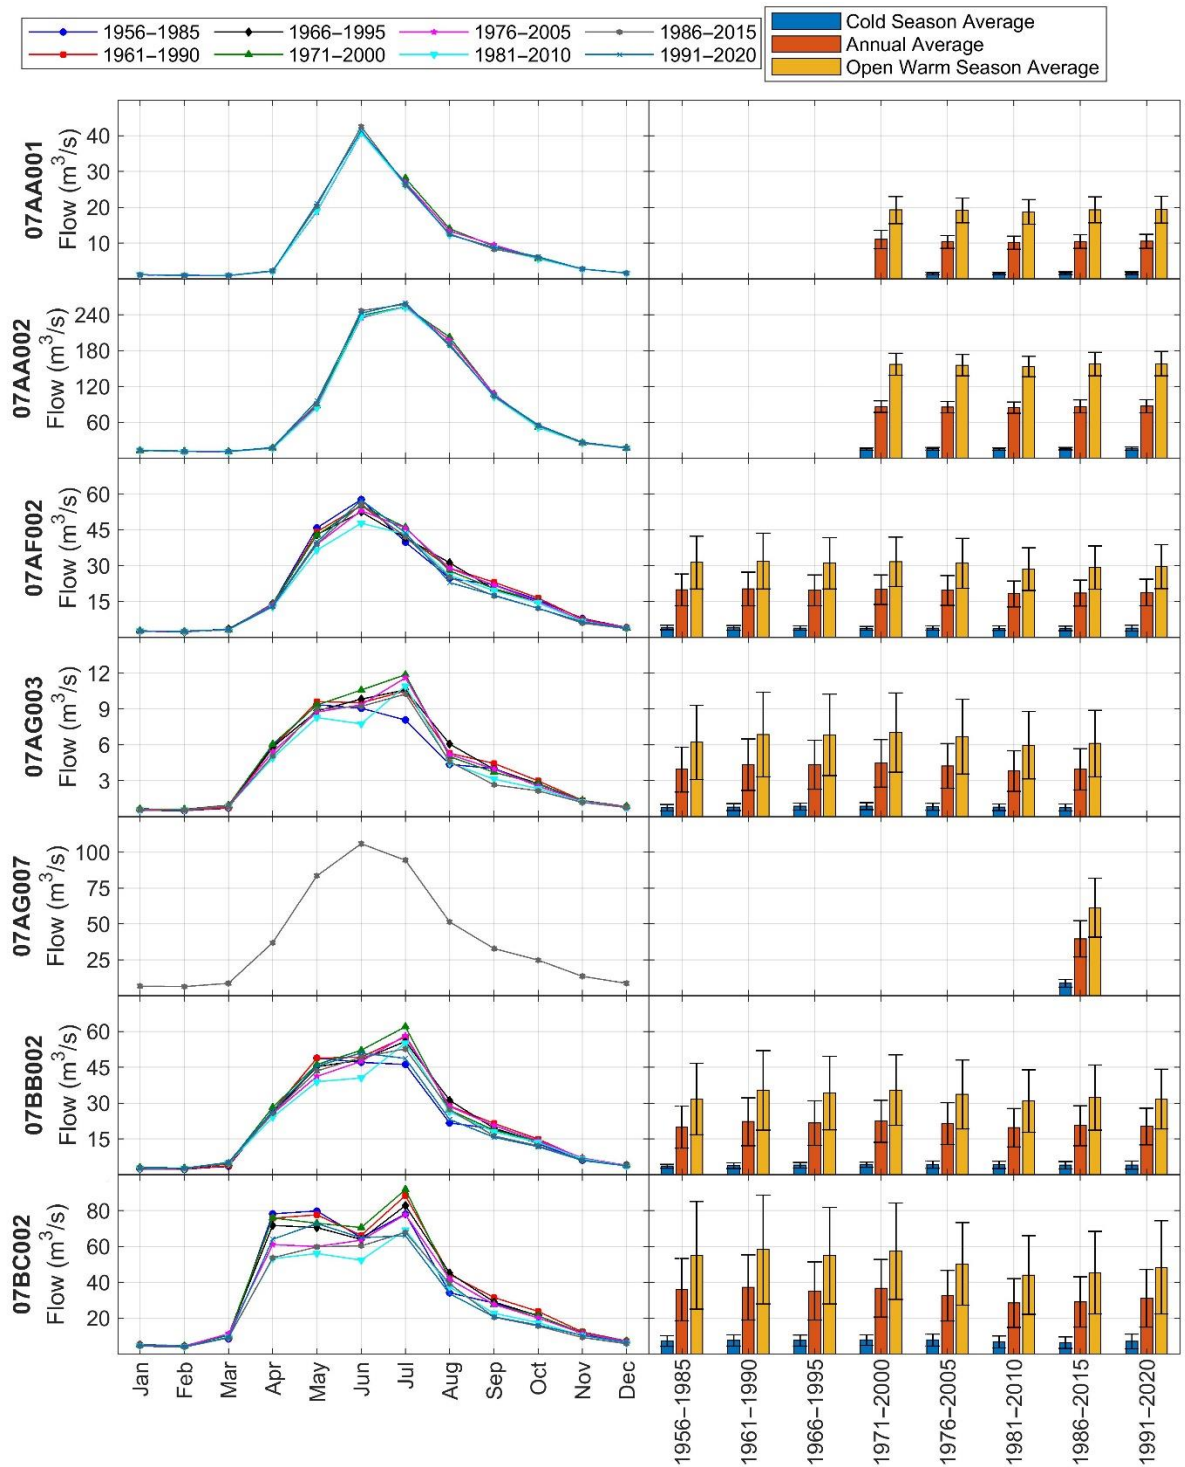

**Figure S1:** Hydrographs (left panels) and seasonal averages with standard deviation (right panels) of ARB stations.

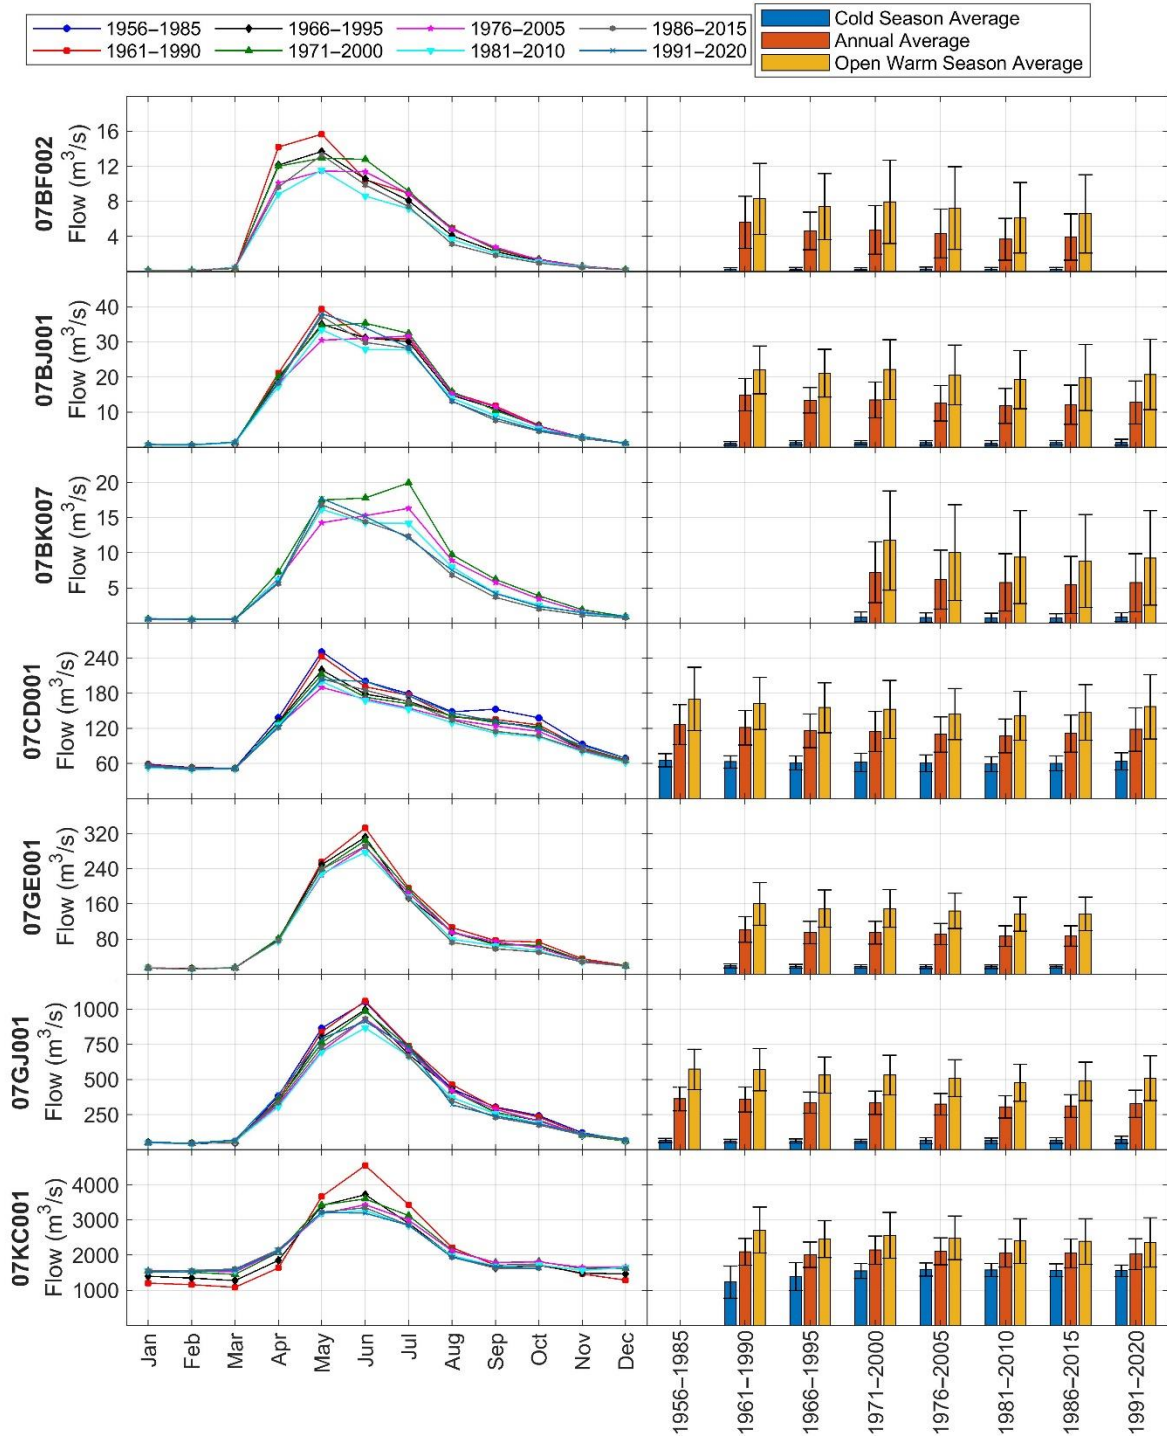

**Figure S2:** Hydrographs (left panels) and seasonal averages with standard deviation (right panels) of ARB stations (continued).

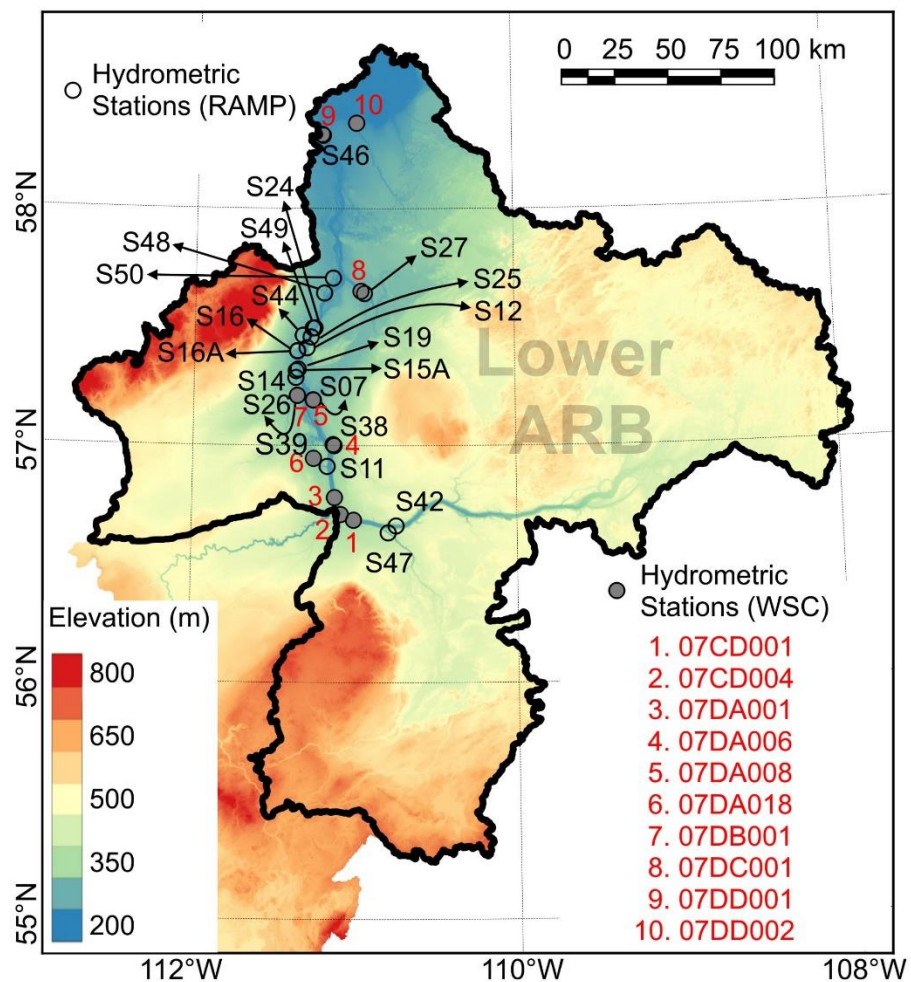

**Figure S3:** Map of the RAMP and WSC gauging stations in the lower ARB. Some stations were replicated in the RAMP and WSC data under different IDs: 07DA006-S38, 07DA008-S07, 07DA018-S39, 07DB001-S26, 07DC001-S27, and 07DD001-S46.

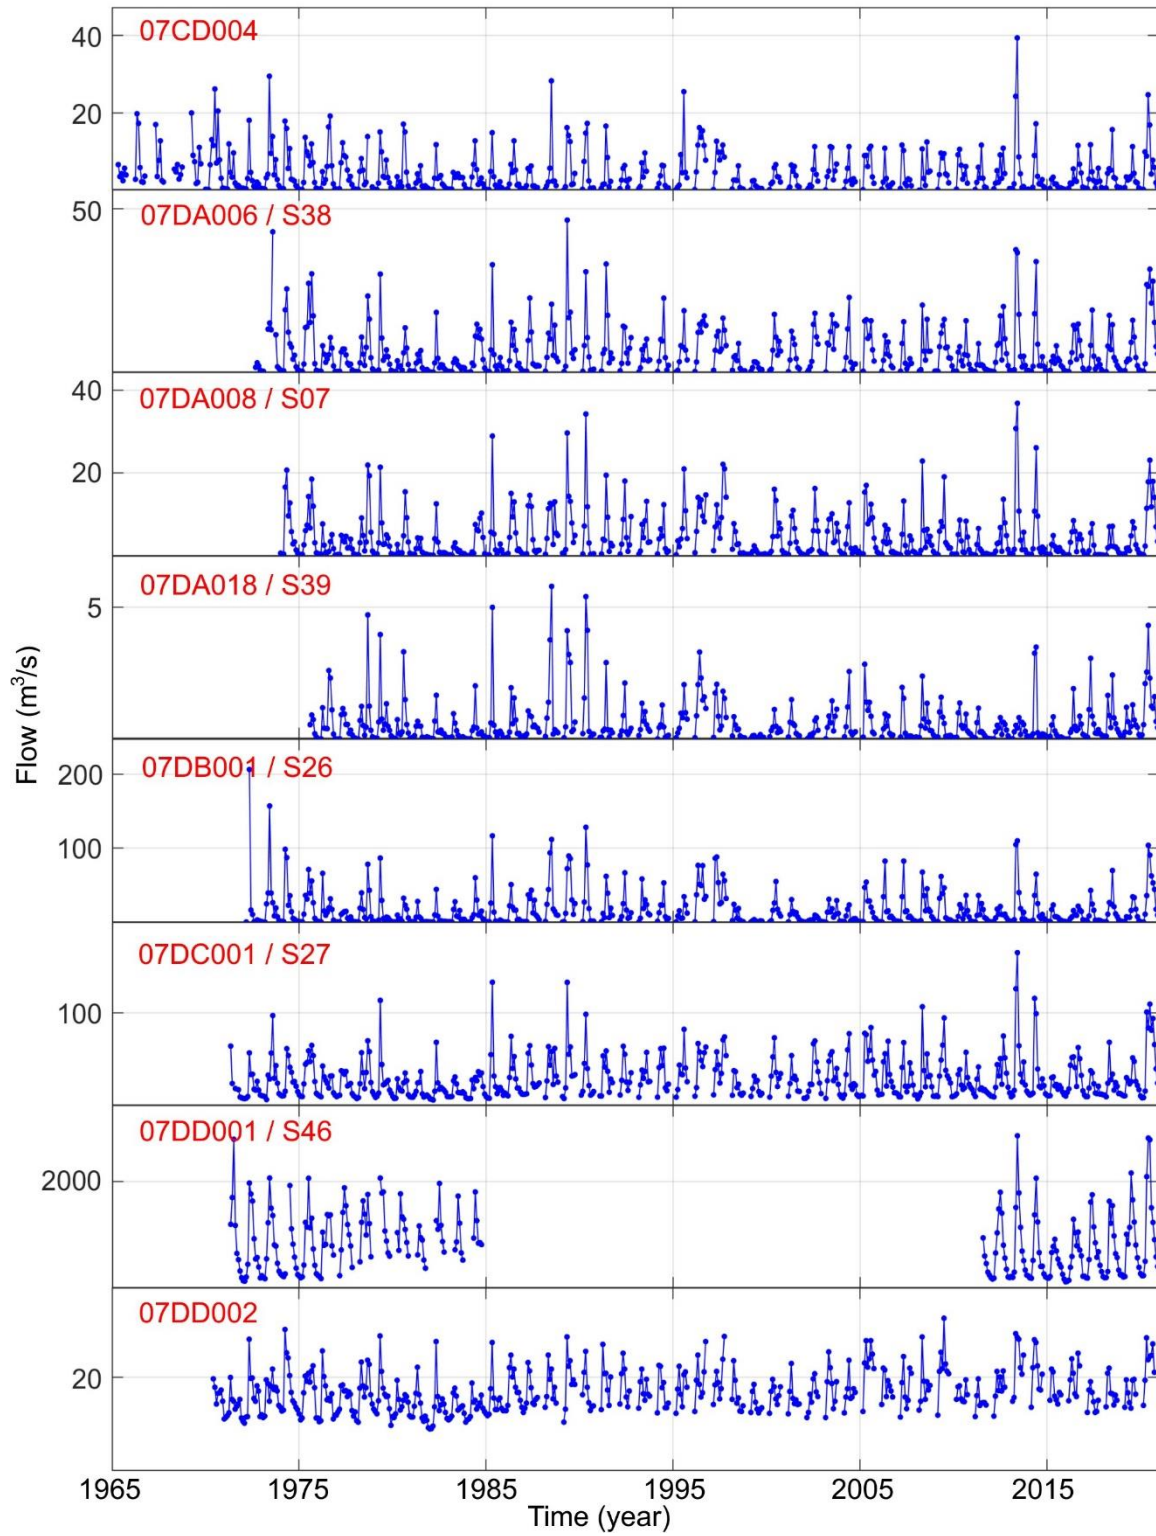

**Figure S4:** Hydrographs of the WSC stations between 1965 and 2020.



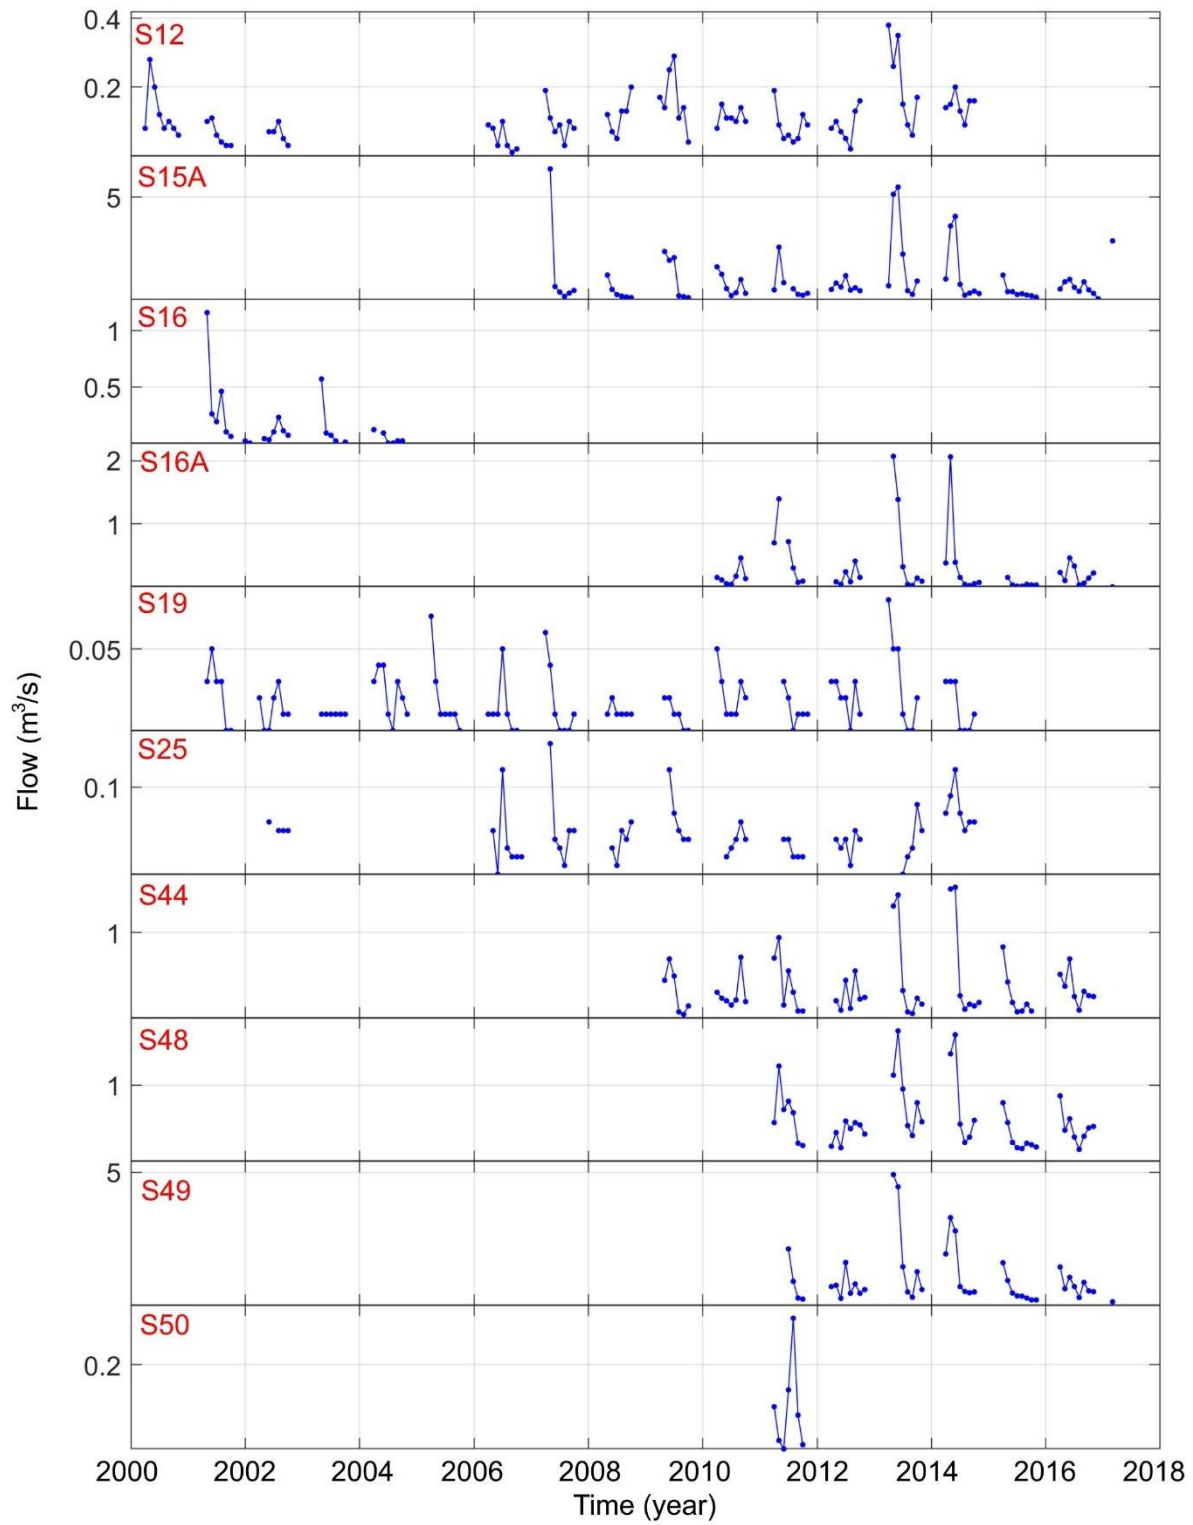

**Figure S5:** Hydrographs of the RAMP stations between 1996 and 2017.

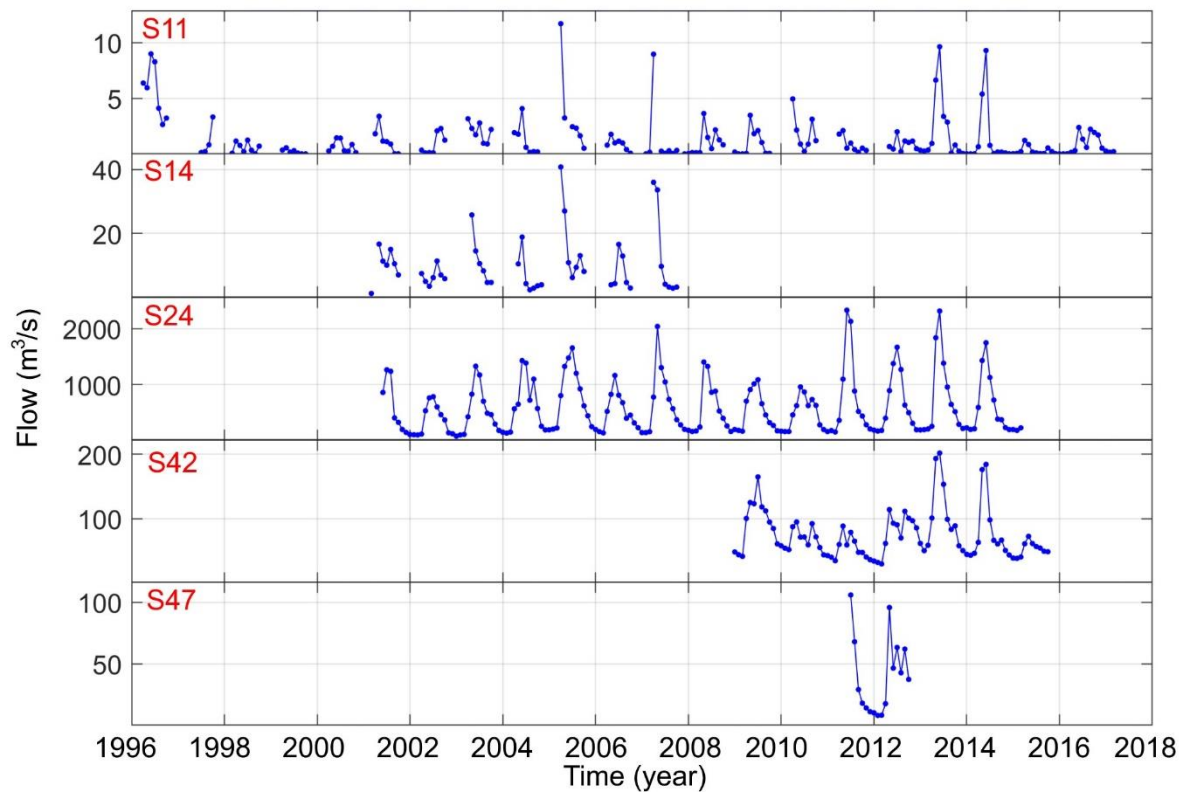

**Figure S6:** Hydrographs of the RAMP stations between 1996 and 2017.

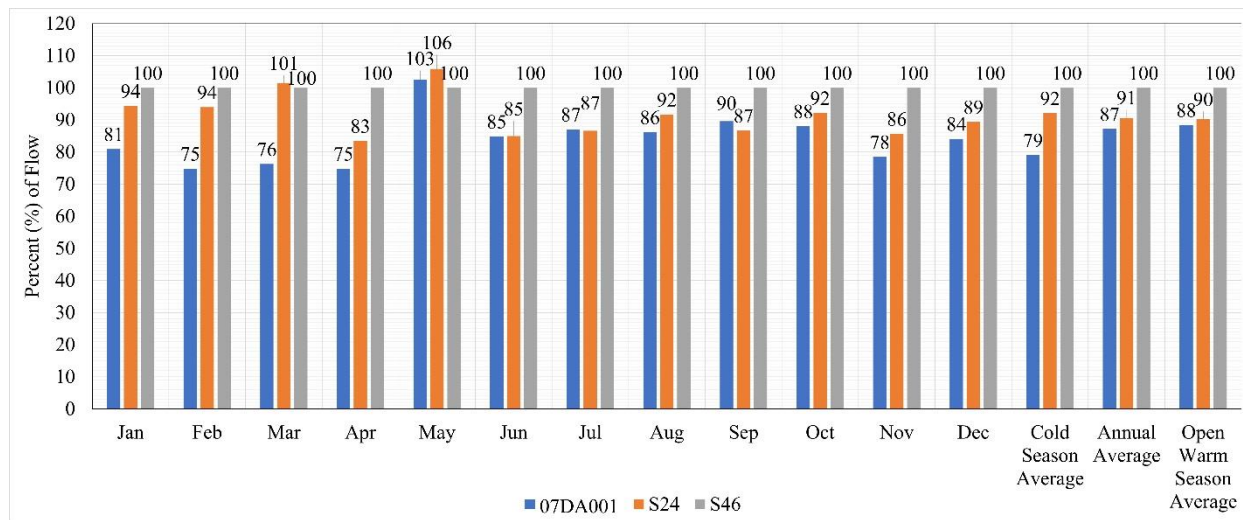

**Figure S7:** Average flow percentages of hydrometric stations at Fort McMurray, Athabasca River below Eymundson Creek, and Embarras Airport for the years 2012, 2013, 2014).

**Table S1:** Mann-Kendall streamflow slope and significance for a period of 30 years (1991-2020). The statistically significant slopes are marked by stars: (\* = 90%), (\*\* = 95%), (\*\*\* = 99%).

| Stations       | Jan     | Feb     | Mar      | Apr     | May     | Jun   | Jul    | Aug    | Sep     | Oct     | Nov     | Dec     | Cold Season Average | Annual Average | Open Warm Season Average |
|----------------|---------|---------|----------|---------|---------|-------|--------|--------|---------|---------|---------|---------|---------------------|----------------|--------------------------|
| <b>07AA001</b> | 0.004   | 0.002   | -0.002   | -0.02   | 0.111   | -0.1  | -0.163 | -0.095 | 0.058   | 0.046   | 0.014   | 0       | -0.003              | -0.01          | -0.012                   |
| <b>07AA002</b> | 0.032   | 0.024   | 0.002    | 0.009   | 0.949   | 0.625 | -0.487 | 0.124  | 0.372   | 0.212   | 0.298** | 0.023   | 0.069               | 0.178          | 0.262                    |
| <b>07AD002</b> | 0.118   | 0.227** | 0.353*** | 0.333   | 1.775   | 3.139 | 0.439  | -0.405 | 1.084   | 0.775   | 0.659** | 0.164   | 0.304**             | 0.911          | 1.48                     |
| <b>07AF002</b> | 0.018   | 0       | -0.001   | -0.174  | 0.312   | 0.329 | -0.055 | -0.059 | 0.174   | 0.112   | 0.061   | 0.025   | 0.014               | 0.055          | 0.069                    |
| <b>07AG003</b> | -0.001  | -0.001  | -0.012*  | -0.07   | 0.207   | 0.17  | 0.001  | -0.011 | 0.013   | 0.009   | 0.004   | 0.005   | -0.006              | 0.021          | 0.034                    |
| <b>07AG007</b> | 0.014   | 0.005   | -0.08    | -0.733  | 0.835   | 2.425 | 1      | -0.178 | 0.214   | 0.214   | 0.087   | 0.073   | -0.025              | 0.208          | 0.393                    |
| <b>07BB002</b> | 0.03    | 0.013   | -0.069   | 0.188   | 0.959   | 0.788 | -0.1   | -0.067 | 0.154   | 0.033   | -0.002  | 0.043   | -0.008              | 0.103          | 0.092                    |
| <b>07BC002</b> | 0.04    | 0.051   | -0.007   | 1.333   | 1.6*    | 1.106 | -0.3   | 0.15   | 0.215   | 0.29    | 0.117   | 0.118   | 0.079               | 0.559          | 0.832                    |
| <b>07BE001</b> | 0.733   | 1.022*  | 0.733    | 3.167   | 10.333* | 8.063 | -0.913 | -2.235 | 2.833   | 2.643   | 1.333   | 1.256*  | 1.353**             | 2.847          | 4.738                    |
| <b>07BF002</b> | 0.003   | 0.001   | -0.01    | 0.218   | 0.388*  | 0.125 | 0.13   | -0.007 | 0.002   | 0.002   | 0.006   | 0.005   | 0.002               | 0.094          | 0.146                    |
| <b>07BJ001</b> | 0.024*  | 0.018   | 0.016    | 0.125   | 0.779*  | 0.135 | 0.142  | -0.005 | -0.027  | -0.006  | 0.004   | 0.017   | 0.028               | 0.186          | 0.324                    |
| <b>07BK007</b> | 0.014*  | 0.012*  | 0.009    | 0.016   | 0.358   | 0.023 | 0.027  | 0.047  | -0.006  | 0.017   | 0.023   | 0.021   | 0.02**              | 0.069          | 0.101                    |
| <b>07CD001</b> | 0.75*** | 0.525** | 0.436**  | 0.2     | 3.2     | 2.391 | 2.75   | 1.731  | 2.538** | 1.906** | 1.374** | 1.011** | 0.857***            | 1.53***        | 2.054**                  |
| <b>07DA001</b> | 1.308   | 1.25    | 1        | -1.282  | 10.056  | 15    | 0.417  | -2.261 | 1.813   | 5.067*  | 2.111   | 1.8     | 1.743**             | 4.286          | 5.588                    |
| <b>07GE001</b> | 0.152   | 0.075   | 0.039    | -0.375  | 2.235   | 0.625 | 0.54   | 0.364  | 0.211   | 0.093   | 0.11    | 0.153*  | 0.12                | 1.053          | 1.42                     |
| <b>07GJ001</b> | 0.7***  | 0.521*  | 0.363    | 6.5     | 15.09*  | 7.821 | 4.964  | 0.143  | 0.622   | 1.237   | 0.823   | 0.655*  | 0.801**             | 4.192**        | 7.411*                   |
| <b>07KC001</b> | -9.231* | -4      | -5       | -22.778 | -6.667  | 2     | -5     | 10     | 5.778   | -4      | -1.667  | -7.071  | -4.741              | -1.6           | -3.571                   |

**Table S2:** Mann-Kendall streamflow slope and significance for a period of 35 years (1986-2020). The statistically significant slopes are marked by stars: (\* = 90%), (\*\* = 95%), (\*\*\* = 99%).

| Stations | Jan     | Feb      | Mar      | Apr    | May     | Jun     | Jul    | Aug    | Sep      | Oct     | Nov     | Dec     | Cold Season Average | Annual Average | Open Warm Season Average |
|----------|---------|----------|----------|--------|---------|---------|--------|--------|----------|---------|---------|---------|---------------------|----------------|--------------------------|
| 07AA001  | 0.007   | 0.005    | 0.001    | -0.019 | 0.014   | -0.202  | -0.054 | -0.096 | 0.066    | 0.06    | 0.008   | 0.001   | -0.001              | -0.008         | -0.015                   |
| 07AA002  | 0.067   | 0.061**  | 0.01     | 0      | 0.421   | -0.091  | 0.111  | -0.333 | 0.293    | 0.193   | 0.18    | 0.031   | 0.057               | 0.086          | 0.107                    |
| 07AD002  | 0.111   | 0.261*** | 0.361*** | 0.307  | 0.542   | 1       | 1.108  | -1.042 | 0.714    | 0.627   | 0.415*  | 0.139   | 0.269***            | 0.55           | 0.787                    |
| 07AF002  | 0.002   | -0.003   | -0.012   | -0.067 | 0.34    | 0.731   | -0.05  | -0.247 | 0.015    | 0.022   | 0.024   | -0.003  | -0.002              | -0.002         | -0.008                   |
| 07AG003  | -0.005  | -0.003   | -0.011** | -0.024 | 0.17    | 0.144   | -0.071 | -0.053 | -0.003   | -0.004  | 0.002   | 0       | -0.008              | 0.01           | 0.006                    |
| 07AG007  | -0.02   | -0.02    | -0.108** | -0.394 | 0.926   | 2.255*  | 0.304  | -0.42  | -0.025   | 0.014   | 0.029   | 0.012   | -0.07               | 0.04           | 0.059                    |
| 07BB002  | 0.008   | 0.001    | -0.066*  | 0.204  | 0.764   | 0.805*  | -0.59  | -0.366 | -0.012   | -0.077  | -0.041  | 0.006   | -0.036              | -0.037         | 0                        |
| 07BC002  | 0       | 0.016    | -0.048   | 0.833  | 1.291*  | 1       | -0.94  | -0.309 | -0.018   | 0.03    | 0.025   | 0.05    | 0.005               | 0.192          | 0.326                    |
| 07BE001  | 0.333   | 0.657    | 0.25     | 2.556  | 9.667** | 4.793   | -4.231 | -4.565 | 0.565    | 1.571   | 0.6     | 0.742   | 0.705               | 1.121          | 1.964                    |
| 07BF002  | 0.001   | 0        | -0.009   | 0.132  | 0.227   | 0.088   | 0.08   | -0.007 | -0.003   | -0.005  | 0       | 0.002   | -0.002              | 0.041          | 0.069                    |
| 07BJ001  | 0.009   | 0.011    | -0.004   | 0.074  | 0.483   | 0.158   | -0.056 | -0.057 | -0.032   | -0.014  | -0.002  | 0.006   | 0.012               | 0.092          | 0.153                    |
| 07BK007  | 0.012   | 0.01*    | 0.007    | -0.009 | 0.318   | -0.023  | 0.01   | 0.043  | 0.018    | 0.018*  | 0.023** | 0.021** | 0.019***            | 0.052          | 0.076                    |
| 07CD001  | 0.586** | 0.371**  | 0.3*     | 0.087  | 1.462   | 1.75    | 1.952  | 1.658  | 2.229*** | 1.683** | 1.218** | 0.742** | 0.62***             | 1.034***       | 1.325***                 |
| 07DA001  | 0.75    | 0.7      | 0.474    | -1.783 | 7.6     | 7.778   | -3.929 | -6     | -0.5     | 2.889   | 1       | 0.667   | 0.817               | 0.264          | 1.451                    |
| 07GE001  | 0.1     | 0.068    | -0.013   | 0.387  | 2       | -0.5    | 0.55   | 0.095  | 0.245    | 0.252   | 0.11    | 0.126*  | 0.054               | 0.422          | 0.571                    |
| 07GJ001  | 0.6**   | 0.422*   | 0.245    | 6.906  | 10.688* | 2.747   | 4.05   | -0.841 | 0.674    | 1.321   | 0.804   | 0.619*  | 0.609**             | 2.63           | 3.461                    |
| 07KC001  | -10**   | -7.143*  | -5       | -16.25 | -6.133  | -18.889 | -16.25 | 3.03   | 2.5      | -5.161  | -2      | -5.5    | -6.5**              | -7.233         | -8.571                   |



**Table S3:** Mann-Kendall streamflow slope and significance for a period of 40 years (1981-2020). The statistically significant slopes are marked by stars: (\* = 90%), (\*\* = 95%), (\*\*\* = 99%).

| Stations       | Jan      | Feb      | Mar     | Apr    | May    | Jun    | Jul     | Aug     | Sep      | Oct      | Nov      | Dec      | Cold Season Average | Annual Average | Open Warm Season Average |
|----------------|----------|----------|---------|--------|--------|--------|---------|---------|----------|----------|----------|----------|---------------------|----------------|--------------------------|
| <b>07AA001</b> | 0.006    | 0.005*   | 0.002   | -0.002 | 0.144  | -0.006 | -0.056  | -0.049  | 0.013    | 0.058*   | 0.014    | 0.006    | 0.005               | 0.011          | 0.02                     |
| <b>07AA002</b> | 0.03     | 0.057**  | 0.024   | 0.057  | 0.6    | 0.308  | 0.1     | -0.462  | 0.196    | 0.247    | 0.127    | 0.05     | 0.059               | 0.108          | 0.177                    |
| <b>07AD002</b> | 0.023    | 0.286*** | 0.30*** | 0.33** | 1.167  | 2.231  | 1.087   | -0.875  | 0.2      | 0.583    | 0.342*   | 0.148    | 0.26***             | 0.614*         | 0.909                    |
| <b>07AF002</b> | -0.003   | 0.007    | -0.009  | 0      | 0.294  | 0.595  | 0.038   | -0.179  | -0.052   | -0.074   | -0.035   | -0.003   | -0.009              | 0.021          | 0.035                    |
| <b>07AG003</b> | -0.002   | -0.002   | -0.008* | -0.015 | 0.137  | 0.113* | -0.02   | -0.023  | -0.005   | -0.005   | -0.004   | 0.002    | -0.005              | 0.013          | 0.021                    |
| <b>07BB002</b> | 0.007    | 0.003    | -0.043  | 0.191  | 0.619* | 0.677* | -0.268  | -0.16   | -0.03    | -0.079   | -0.056   | 0.016    | -0.024              | 0.032          | 0.063                    |
| <b>07BC002</b> | -0.025   | -0.011   | -0.068  | 0.414  | 0.886  | 0.798  | -0.659  | -0.144  | -0.053   | -0.022   | -0.024   | 0.013    | -0.038              | 0.123          | 0.192                    |
| <b>07BE001</b> | -0.053   | 0.404    | 0       | 2.087  | 8.44** | 4.897  | -2.281  | -3.286  | -0.636   | 0.581    | -0.202   | 0.267    | 0.053               | 0.753          | 1.143                    |
| <b>07BF002</b> | 0.002    | 0.001    | -0.008  | 0.164  | 0.152  | 0.056  | 0.074   | -0.007  | -0.01    | -0.005   | 0        | 0.002    | -0.002              | 0.019          | 0.035                    |
| <b>07BJ001</b> | 0.013    | 0.011*   | 0.001   | 0.123  | 0.416  | 0.057  | -0.018  | -0.032  | -0.041   | -0.018   | -0.001   | 0.012    | 0.014               | 0.065          | 0.095                    |
| <b>07BK007</b> | 0.01*    | 0.009*   | 0.007   | -0.026 | 0.185  | 0.037  | -0.085  | 0.008   | -0.005   | 0.009    | 0.013    | 0.012    | 0.013**             | 0.005          | -0.003                   |
| <b>07CD001</b> | 0.453*** | 0.26**   | 0.212   | 0.127  | 0.887  | 1.427  | 1.884*  | 1.629** | 1.918*** | 1.472*** | 1.001*** | 0.717*** | 0.539***            | 0.945***       | 1.254***                 |
| <b>07DA001</b> | 0.209    | 0.167    | 0.179   | -0.889 | 5.036  | 8.266  | -3.415  | -3.045  | -1.458   | 0.685    | -0.382   | 0.167    | -0.024              | 0.034          | 0.996                    |
| <b>07GE001</b> | 0.071    | 0.039    | -0.008  | 0.68   | 1.5    | 0.093  | -0.027  | -0.189  | -0.064   | 0.09     | 0.069    | 0.132**  | 0.06                | 0.231          | 0.32                     |
| <b>07GJ001</b> | 0.41*    | 0.253    | 0.114   | 6.167* | 7.281* | 2.111  | 1.636   | -1.722  | -0.077   | 0.727    | 0.522    | 0.527**  | 0.425*              | 1.636          | 2.132                    |
| <b>07KC001</b> | -4.248   | -2.929   | 1.852   | -4.444 | -10    | -7.636 | -12.714 | -2.5    | -3.043   | -7.842** | -4.226   | -6.25    | -2.947              | -4.459         | -7.345                   |

**Table S4:** Mann-Kendall streamflow slope and significance for a period of 45 years (1976-2020). The statistically significant slopes are marked by stars: (\* = 90%), (\*\* = 95%), (\*\*\*) = 99%).

| Stations       | Jan    | Feb      | Mar      | Apr    | May    | Jun     | Jul     | Aug     | Sep      | Oct      | Nov      | Dec    | Cold Season<br>Average | Annual<br>Average | Open Warm<br>Season<br>Average |
|----------------|--------|----------|----------|--------|--------|---------|---------|---------|----------|----------|----------|--------|------------------------|-------------------|--------------------------------|
| <b>07AA001</b> | 0.007* | 0.007**  | 0.005*   | -0.005 | 0.147  | 0.018   | -0.087  | -0.064  | -0.032   | 0.033    | 0.013    | 0.003  | 0.004                  | -0.002            | -0.012                         |
| <b>07AA002</b> | 0.007  | 0.033*   | 0.028*   | 0.022  | 0.532  | 0.493   | 0.082   | -0.412  | 0        | 0.134    | 0.124    | 0.023  | 0.037                  | 0.09              | 0.143                          |
| <b>07AD002</b> | 0.114  | 0.236*** | 0.253*** | 0.25** | 1      | 2       | 0.857   | -0.625  | -0.056   | 0.395    | 0.445*** | 0.135  | 0.257***               | 0.473             | 0.738                          |
| <b>07AF002</b> | 0.008  | 0.01     | 0.003    | -0.028 | 0.111  | 0.294   | -0.018  | -0.243  | -0.159   | -0.079   | -0.02    | -0.01  | -0.003                 | -0.035            | -0.059                         |
| <b>07AG003</b> | -0.001 | -0.002   | -0.006*  | -0.019 | 0.091  | 0.049   | -0.014  | -0.049* | -0.026   | -0.012   | -0.007   | -0.001 | -0.005                 | -0.005            | -0.013                         |
| <b>07BB002</b> | 0.007  | 0.009    | -0.019   | 0.122  | 0.315  | 0.32    | -0.038  | -0.189  | -0.1     | -0.067   | -0.037   | -0.001 | -0.008                 | -0.011            | -0.022                         |
| <b>07BC002</b> | -0.029 | -0.02    | -0.072   | 0.007  | 0.419  | 0.221   | -0.6    | -0.257  | -0.158   | -0.096   | -0.052   | -0.02  | -0.053                 | -0.082            | -0.07                          |
| <b>07BE001</b> | -0.288 | -0.014   | -0.353   | 0.217  | 4.184  | 1.54    | -3.588  | -4**    | -2.923*  | -0.786   | -0.667   | -0.039 | -0.258                 | -0.786            | -1.282                         |
| <b>07BF002</b> | 0      | 0        | -0.004   | 0.01   | 0.04   | -0.088  | -0.001  | -0.011  | -0.034   | -0.013   | -0.003   | 0.001  | -0.003                 | -0.027            | -0.047                         |
| <b>07BJ001</b> | 0.007  | 0.005    | 0.001    | 0.029  | 0.233  | -0.103  | -0.113  | -0.061  | -0.092   | -0.046   | -0.008   | 0.006  | 0.008                  | -0.006            | -0.023                         |
| <b>07BK007</b> | 0.009* | 0.007*   | 0.003    | -0.033 | 0.091  | -0.023  | -0.11   | -0.047  | -0.045   | -0.008   | 0        | 0.007  | 0.004                  | -0.044            | -0.077                         |
| <b>07CD001</b> | 0.159  | 0.034    | 0.07     | -0.147 | 0.705  | 0.833   | 1.304   | 0.661   | 0.582    | 0.573    | 0.405    | 0.375* | 0.266*                 | 0.493             | 0.584                          |
| <b>07DA001</b> | -0.869 | -0.528   | -0.559   | -3.243 | 1.9    | 3.205   | -4.424  | -5.88   | -5.729** | -2.158   | -1.512   | -0.509 | -0.812                 | -1.823            | -2.421                         |
| <b>07GE001</b> | 0.046  | 0.021    | 0.003    | 0.293  | 0.615  | -0.691  | -0.685  | -0.587  | -0.471   | -0.297   | -0.036   | 0.077  | 0.012                  | -0.164            | -0.266                         |
| <b>07GJ001</b> | 0.285* | 0.159    | 0.086    | 3.375  | 4.063  | -2.263  | -0.938  | -2.214  | -1.625   | -0.333   | 0.364    | 0.357  | 0.302                  | 0.21              | -0.026                         |
| <b>07KC001</b> | -4     | -2       | 2.795    | 0      | -7.692 | -13.583 | -15.227 | -3.859  | -5       | -8.714** | -4.777   | -4.629 | -2.2                   | -4.997*           | -8.674*                        |

**Table S5:** Mann-Kendall streamflow slope and significance for a period of 50 years (1971-2020). The statistically significant slopes are marked by stars: (\* = 90%), (\*\* = 95%), (\*\*\* = 99%).

| Stations       | Jan     | Feb    | Mar      | Apr     | May    | Jun      | Jul       | Aug      | Sep     | Oct     | Nov      | Dec    | Cold Season Average | Annual Average | Open Warm Season Average |
|----------------|---------|--------|----------|---------|--------|----------|-----------|----------|---------|---------|----------|--------|---------------------|----------------|--------------------------|
| <b>07AA002</b> | 0.016   | 0.006  | 0.026**  | 0.042   | 0.482  | 0.16     | 0.2       | -0.556** | 0.073   | 0.107   | 0.1      | 0.033  | 0.036               | 0.047          | 0.079                    |
| <b>07AD002</b> | 0.141** | 0.2*** | 0.209*** | 0.24*** | 0.805  | 1.07     | 0.427     | -0.634   | 0.137   | 0.333   | 0.385*** | 0.106  | 0.222***            | 0.311          | 0.44                     |
| <b>07AF002</b> | 0.008   | 0.01   | 0.008    | -0.049  | -0.08  | 0.051    | -0.003    | -0.037   | -0.051  | -0.062  | -0.016   | -0.01  | 0                   | -0.036         | -0.061                   |
| <b>07AG003</b> | -0.003  | -0.002 | -0.006** | -0.044  | 0.017  | 0.028    | -0.013    | -0.028   | -0.014  | -0.018  | -0.006   | -0.003 | -0.005*             | -0.017         | -0.034                   |
| <b>07BB002</b> | 0.007   | 0.004  | -0.003   | -0.016  | 0.027  | 0.136    | -0.094    | -0.076   | -0.019  | -0.055  | -0.036   | 0      | -0.005              | -0.072         | -0.117                   |
| <b>07BC002</b> | -0.016  | -0.01  | -0.015   | -0.35   | -0.077 | -0.028   | -0.883*   | -0.274   | -0.147* | -0.116  | -0.06    | -0.024 | -0.031              | -0.191         | -0.329                   |
| <b>07BE001</b> | -0.255  | -0.093 | -0.21    | -0.75   | 0.727  | -0.5     | -5        | -3.366** | -2.208* | -1.182  | -0.9     | -0.188 | -0.286              | -1.869         | -2.73                    |
| <b>07BF002</b> | 0       | 0      | -0.002   | -0.073  | -0.008 | -0.099   | -0.021    | -0.011   | -0.022* | -0.014  | -0.006   | -0.001 | -0.003              | -0.034         | -0.063                   |
| <b>07BJ001</b> | 0.002   | 0.003  | 0        | -0.055  | 0.007  | -0.275   | -0.191    | -0.074   | -0.075  | -0.052* | -0.01    | 0.001  | 0.005               | -0.062         | -0.116                   |
| <b>07BK007</b> | 0.005   | 0.006  | 0.003    | -0.04   | -0.039 | -0.157   | -0.23**   | -0.079   | -0.055* | -0.022  | -0.011   | 0.002  | 0.001               | -0.079**       | -0.137**                 |
| <b>07CD001</b> | 0.073   | 0.013  | 0.025    | -0.378  | -0.455 | 0.29     | 0.464     | 0.211    | 0.284   | 0.158   | 0.209    | 0.207  | 0.143               | 0.154          | 0.148                    |
| <b>07DA001</b> | -1*     | -0.694 | -0.556   | -3.591  | -3.036 | -2.286   | -8.611*   | -6.32**  | -5.09** | -3.25*  | -2.027*  | -0.8   | -1.022**            | -3.089***      | -4.61**                  |
| <b>07GE001</b> | 0.05    | 0.021  | 0.023    | -0.057  | 0.105  | -1.2     | -0.828    | -0.3     | -0.289  | -0.607  | -0.088   | 0      | -0.013              | -0.247         | -0.45                    |
| <b>07GJ001</b> | 0.157   | 0.108  | 0.113    | 1.162   | 0.712  | -4.414   | -1.254    | -1.557   | -0.764  | -1.056  | -0.038   | 0.231  | 0.15                | -0.692         | -1.34                    |
| <b>07KC001</b> | -1.111  | 1.29   | 4.118*   | 2.373   | -15    | -18.889* | -23.333** | -6.036   | -4.848  | -8***   | -2.973   | -0.294 | 0.545               | -5.365**       | -10.667**                |

**Table S6:** Mann-Kendall streamflow slope and significance for a period of 55 years (1966-2020). The statistically significant slopes are marked by stars: (\* = 90%), (\*\* = 95%), (\*\*\* = 99%).

| Stations       | Jan    | Feb      | Mar      | Apr     | May     | Jun      | Jul     | Aug      | Sep      | Oct     | Nov      | Dec    | Cold Season Average | Annual Average | Open Warm Season Average |
|----------------|--------|----------|----------|---------|---------|----------|---------|----------|----------|---------|----------|--------|---------------------|----------------|--------------------------|
| <b>07AD002</b> | 0.103* | 0.124*** | 0.189*** | 0.21*** | 0.748   | 0.35     | 0.104   | -1.075** | -0.013   | 0.276   | 0.318*** | 0.099  | 0.173***            | 0.138          | 0.145                    |
| <b>07AF002</b> | 0.008  | 0.01     | -0.003   | -0.026  | -0.1    | 0.104    | 0.008   | -0.071   | 0        | -0.011  | -0.004   | -0.002 | -0.002              | -0.027         | -0.048                   |
| <b>07AG003</b> | -0.001 | -0.001   | -0.004*  | -0.031  | 0.037   | 0.05     | 0.034   | -0.043** | -0.009   | -0.012  | -0.003   | -0.001 | -0.003              | -0.001         | -0.004                   |
| <b>07BB002</b> | 0.011  | 0.011    | -0.003   | 0.095   | 0.077   | 0.195    | 0.076   | -0.117   | -0.01    | -0.038  | -0.013   | 0.001  | 0.003               | -0.01          | -0.016                   |
| <b>07BC002</b> | -0.009 | -0.003   | 0.003    | -0.194  | 0.036   | 0.148    | -0.3    | -0.285   | -0.117   | -0.063  | -0.022   | 0.003  | -0.012              | -0.084         | -0.125                   |
| <b>07BE001</b> | -0.143 | 0.016    | 0.056    | 0.111   | 1.091   | 0.241    | -1.333  | -3.132** | -1.778*  | -0.583  | -0.452   | -0.083 | -0.107              | -0.751         | -1.277                   |
| <b>07CD001</b> | 0.06   | 0.036    | 0.063    | -0.273  | -0.5    | 0.143    | 0.474   | 0.205    | 0.154    | -0.143  | 0.114    | 0.122  | 0.103               | 0.065          | 0.029                    |
| <b>07DA001</b> | -0.638 | -0.45    | -0.341   | -1.841  | -2.837  | -0.789   | -5      | -5.263** | -4.459** | -2.75*  | -1.4*    | -0.471 | -0.618              | -2.344**       | -3.265*                  |
| <b>07GE001</b> | 0.008  | -0.002   | -0.007   | -0.078  | -0.5    | -1.05    | -0.289  | -0.385   | -0.324   | -0.478* | -0.076   | 0.016  | -0.014              | -0.288         | -0.519                   |
| <b>07GJ001</b> | 0.118  | 0.052    | 0.05     | 0.792   | -0.752  | -3.88    | 0.588   | -1.829*  | -0.764   | -0.5    | 0.126    | 0.277  | 0.156               | -0.499         | -0.951                   |
| <b>07KC001</b> | 5      | 8.148**  | 10***    | 9.545*  | -12.516 | -17.941* | -18.81* | -0.571   | 0        | -3.684  | 3.828    | 6.429* | 4.444**             | -2.348         | -8.112*                  |

**Table S7:** Mann-Kendall streamflow slope and significance for a period of 60 years (1961-2020). The statistically significant slopes are marked by stars: (\* = 90%), (\*\* = 95%), (\*\*\*) = 99%).

| Stations       | Jan     | Feb      | Mar      | Apr    | May      | Jun       | Jul      | Aug     | Sep     | Oct      | Nov     | Dec     | Cold Season Average | Annual Average | Open Warm Season Average |
|----------------|---------|----------|----------|--------|----------|-----------|----------|---------|---------|----------|---------|---------|---------------------|----------------|--------------------------|
| <b>07AD002</b> | 0.123** | 0.125*** | 0.225*** | 0.14** | 0.99*    | -0.077    | -0.25    | -0.89** | -0.176  | 0.12     | 0.199*  | 0.061   | 0.14***             | 0.063          | -0.01                    |
| <b>07AF002</b> | 0.009   | 0.009    | -0.003   | -0.036 | -0.143   | 0.091     | 0.011    | -0.029  | -0.033  | -0.043   | -0.02   | -0.008  | -0.009              | -0.027         | -0.048                   |
| <b>07AG003</b> | 0.002   | 0.001    | -0.001   | -0.031 | 0.01     | 0.071*    | 0.048    | -0.024  | -0.007  | -0.01    | -0.001  | 0       | 0                   | 0.003          | 0.001                    |
| <b>07BB002</b> | 0.019** | 0.017**  | 0.016    | 0.064  | -0.037   | 0.218     | 0.127    | -0.067  | -0.021  | -0.032   | -0.013  | 0.006   | 0.009               | -0.005         | -0.008                   |
| <b>07BC002</b> | -0.007  | 0.009    | 0.017    | -0.177 | -0.149   | 0.193     | -0.068   | -0.2    | -0.112  | -0.054   | -0.024  | 0.004   | 0.003               | -0.053         | -0.07                    |
| <b>07BE001</b> | -0.107  | 0.059    | 0.191    | -0.212 | -0.029   | -0.264    | -0.911   | -2.9**  | -1.783* | -0.882   | -0.573  | -0.157  | -0.083              | -0.746         | -1.268                   |
| <b>07CD001</b> | 0.034   | 0.035    | 0.058    | 0      | -0.919   | -0.186    | 0.436    | 0.209   | 0.183   | -0.037   | 0.119   | 0.128   | 0.087               | 0              | -0.005                   |
| <b>07DA001</b> | -0.636* | -0.429   | -0.224   | -1.2   | -4.5     | -1.731    | -3.766   | -4.14*  | -3.9**  | -2.64**  | -1.36** | -0.486  | -0.635*             | -2.26**        | -2.99**                  |
| <b>07GE001</b> | 0.004   | -0.024   | 0        | -0.005 | -0.818   | -1.141    | -0.432   | -0.362  | -0.365* | -0.606** | -0.176* | -0.018  | -0.052              | -0.334         | -0.587                   |
| <b>07GJ001</b> | 0.095   | 0.016    | 0.092    | 0.143  | -1.895   | -3.857    | -0.455   | -1.814* | -1.095  | -1.047   | -0.148  | 0.213   | 0.099               | -0.923         | -1.667                   |
| <b>07KC001</b> | 11***   | 13.5***  | 15.9***  | 15***  | -19.49** | -37.43*** | -29.4*** | -4.348  | -1.429  | -2.887   | 4.859   | 12.7*** | 9.6***              | -4.574*        | -15***                   |

**Table S8:** Mann-Kendall streamflow slope and significance for a period of 65 years (1956-2020). The statistically significant slopes are marked by stars: (\* = 90%), (\*\* = 95%), (\*\*\*) = 99%).

| Stations       | Jan      | Feb     | Mar    | Apr    | May    | Jun    | Jul    | Aug     | Sep     | Oct     | Nov      | Dec    | Cold Season Average | Annual Average | Open Warm Season Average |
|----------------|----------|---------|--------|--------|--------|--------|--------|---------|---------|---------|----------|--------|---------------------|----------------|--------------------------|
| <b>07AF002</b> | 0.002    | 0.006   | -0.003 | -0.044 | -0.132 | 0.042  | 0.045  | 0.009   | -0.016  | -0.021  | -0.026   | -0.009 | -0.011              | -0.016         | -0.028                   |
| <b>07AG003</b> | 0.002    | 0.002   | 0      | -0.025 | 0.036  | 0.061* | 0.061  | -0.005  | 0.002   | -0.005  | 0        | 0.001  | 0.001               | 0.012          | 0.018                    |
| <b>07BB002</b> | 0.021*** | 0.014** | 0.015  | 0.065  | 0.036  | 0.189  | 0.2    | 0.031   | 0.018   | 0.002   | -0.002   | 0.01   | 0.01                | 0.049          | 0.08                     |
| <b>07BE001</b> | 0        | 0.143   | 0.226  | -0.286 | 0.095  | 0.031  | 0.119  | -1.641  | -1.282  | -0.484  | -0.157   | -0.047 | 0.016               | -0.292         | -0.433                   |
| <b>07CD001</b> | 0.014    | 0.029   | 0.048  | -0.188 | -1*    | -0.3   | 0.453  | 0.208   | 0.051   | -0.206  | -0.015   | 0.02   | 0.017               | -0.052         | -0.069                   |
| <b>07DA001</b> | -0.571   | -0.324  | -0.095 | -1.667 | -3.778 | -1.29  | -2.926 | -2.5    | -3.75** | -2.19** | -1.209** | -0.466 | -0.536              | -1.927**       | -2.614*                  |
| <b>07GJ001</b> | 0.111    | 0.096   | 0.143  | 0      | -1.694 | -3.034 | 0.2    | -1.407* | -0.806  | -1      | -0.21    | 0.11   | 0.005               | -0.603         | -1.091                   |

**Table S9:** Mann-Kendall Trend Analysis of the RAMP streamflow data for the period of 1996 – 2017. Cells highlighted in red represent insufficient data for a robust analysis. The statistically significant slopes are marked by stars: (\* = 90%), (\*\* = 95%), (\*\* = 99%).

| Stations | Jan    | Feb    | Mar    | Apr    | May    | Jun    | Jul    | Aug      | Sep    | Oct    | Nov    | Dec   | Cold Season Average | Annual Average | Open Warm Season Average |
|----------|--------|--------|--------|--------|--------|--------|--------|----------|--------|--------|--------|-------|---------------------|----------------|--------------------------|
| S11      | -0.003 | 0      | 0.003  | -0.032 | 0.011  | 0.024  | -0.006 | -0.01    | 0.002  | -0.006 | 0.01   | 0.007 | 0.009               | -0.012         | 0.019                    |
| S12      | N/A    | N/A    | N/A    | 0.005  | 0.003  | 0.002  | 0.002  | 0        | 0.005* | 0.01** | N/A    | N/A   | N/A                 | 0.006          | 0.006                    |
| S14      | N/A    | N/A    | N/A    | 5.71   | 2.59   | -0.272 | -0.414 | -1.408   | -1.172 | -0.635 | N/A    | N/A   | N/A                 | 0.46           | 0.235                    |
| S15A     | N/A    | N/A    | N/A    | 0.008  | -0.17  | 0.039  | 0.005  | 0.017    | 0.02   | 0.028  | -0.002 | N/A   | 0.028               | -0.001         | -0.027                   |
| S16      | N/A    | N/A    | N/A    | N/A    | -0.295 | -0.028 | -0.06* | -0.182*  | -0.027 | -0.019 | N/A    | N/A   | N/A                 | -0.11          | -0.11                    |
| S16A     | N/A    | N/A    | N/A    | -0.031 | -0.002 | 0.035  | -0.006 | -0.03**  | -0.025 | -0.01  | 0.012  | N/A   | -0.021              | -0.037         | -0.023                   |
| S19      | N/A    | N/A    | N/A    | 0.001  | 0.002  | 0.002  | 0      | -0.001** | 0      | 0      | N/A    | N/A   | N/A                 | 0              | 0                        |
| S24      | 6.9**  | 6.3*** | 8.1*** | -10.66 | 54.55* | 63.51* | 14.47  | 5.923    | 6.563  | 4.93   | 2.89   | 3.57  | 3.29***             | 1.309          | 21.126                   |
| S25      | N/A    | N/A    | N/A    | N/A    | 0.002  | 0.004  | -0.001 | 0        | 0      | 0.001  | N/A    | N/A   | N/A                 | 0              | -0.001                   |
| S42      | -1.573 | -1.287 | -0.173 | -5.294 | -3.623 | 0.55   | -2.948 | -2.653   | -10.26 | -5.602 | -6.683 | -2.6  | -2.043              | -2.9           | -3.512                   |
| S44      | N/A    | N/A    | N/A    | 0.034  | 0.031  | 0.019  | -0.047 | -0.005   | 0.02   | 0.01   | 0.011  | N/A   | 0.011               | 0.007          | 0.009                    |
| S47      | N/A      | N/A    | N/A    | N/A    | N/A   | N/A                 | N/A            | N/A                      |
| S48      | N/A    | N/A    | N/A    | 0.08   | -0.1   | -0.024 | -0.1   | -0.09**  | -0.003 | 0.003  | 0.003  | N/A   | 0.003               | -0.035         | -0.035                   |
| S49      | N/A    | N/A    | N/A    | 0.012  | -0.825 | -0.404 | 0.35** | -0.08    | 0.015  | 0.023  | -0.023 | N/A   | -0.064              | -0.125         | -0.041                   |
| S50      | N/A      | N/A    | N/A    | N/A    | N/A   | N/A                 | N/A            | N/A                      |



**Table S10:** Mann-Kendall Trend Analysis of the Lower ARB streamflow for the period of 1991 – 2020. Cells highlighted in red represent insufficient data for a robust analysis. The statistically significant slopes are marked by stars: (\* = 90%), (\*\* = 95%), (\*\*\* = 99%).

| Stations     | Jan    | Feb     | Mar     | Apr    | May    | Jun     | Jul     | Aug    | Sep    | Oct     | Nov    | Dec     | Cold Season Average | Annual Average | Open Warm Season Average |
|--------------|--------|---------|---------|--------|--------|---------|---------|--------|--------|---------|--------|---------|---------------------|----------------|--------------------------|
| 07CD004      | -0.01  | 0.009   | 0.006   | 0.05   | 0.11   | -0.041  | -0.006  | -0.003 | -0.003 | 0.017   | 0.183  | 0.109   | 0.01**              | -0.03          | 0.029                    |
| 07DA006 /S38 | -0.021 | -0.016  | -0.001  | -0.01  | 0.096  | -0.008  | 0.055   | -0.014 | 0.069  | 0.055   | -0.012 | 0.027   | 0.024***            | -0.077         | 0.028                    |
| 07DA008 /S7  | -0.008 | -0.007  | -0.01** | -0.019 | -0.057 | -0.104  | -0.054  | -0.031 | -0.023 | -0.013  | -0.011 | -0.003  | 0.005               | -0.092*        | -0.081                   |
| 07DA018 /S39 | 0.003  | 0.007** | 0.001   | 0.014* | 0.019  | -0.018  | 0.005   | 0.002  | -0.001 | 0.005   | 0.012  | 0.008   | 0.003***            | -0.003         | 0.006                    |
| 07DB001 /S26 | -0.012 | 0.002   | 0.004   | -0.104 | 0.206  | 0.037   | 0.039   | 0.082  | 0.003  | 0.153   | 0.112  | 0.05**  | 0.05**              | -0.202         | -0.007                   |
| 07DC001 /S27 | 0.1    | 0.064   | 0.02    | -0.33  | 0.27   | -0.155  | 0.022   | -0.001 | 0.38   | 0.132   | -0.17  | 0.241*  | 0.182***            | -0.184         | 0.156                    |
| 07DD001 /S46 | 7.619  | 5.139   | 4.585   | 2.721  | 13.177 | -46.608 | 116.915 | 61.269 | 61.392 | 43.12** | 26.333 | 17.58** | 9.272               | 37.977         | 61.651                   |
| 07DD002      | N/A    | N/A     | 0.025   | -0.08  | 0.03   | 0.01    | 0.04    | 0.08   | 0.093  | 0.05    | N/A    | N/A     | 0.025               | 0.017          | 0.017                    |

**Table S11:** Mann-Kendall Trend Analysis of the Lower ARB streamflow for the period of 1986 – 2020. Cells highlighted in red represent insufficient data for a robust analysis. The statistically significant slopes are marked by stars: (\* = 90%), (\*\* = 95%), (\*\*\* = 99%).

| Stations     | Jan    | Feb     | Mar     | Apr     | May     | Jun     | Jul     | Aug    | Sep    | Oct     | Nov    | Dec     | Cold Season Average | Annual Avg | Open Warm Season Avg |
|--------------|--------|---------|---------|---------|---------|---------|---------|--------|--------|---------|--------|---------|---------------------|------------|----------------------|
| 07CD004      | 0      | 0.003   | 0.003   | 0.038   | 0.036   | -0.059  | -0.067  | 0.025  | 0.025  | 0.028   | 0.102  | 0.074   | 0.007               | -0.024     | 0.006                |
| 07DA006 /S38 | -0.001 | 0       | -0.002  | -0.04   | -0.091  | -0.027  | 0.008   | 0.013  | 0.084  | 0.055   | 0.022  | 0.02    | 0.016***            | -0.063     | -0.009               |
| 07DA008 /S7  | -0.001 | -0.001  | -0.01** | -0.061  | -0.21** | -0.167* | -0.092  | -0.026 | -0.002 | -0.016  | -0.008 | 0.001   | 0.006               | -0.098***  | -0.108*              |
| 07DA018 /S39 | 0.002  | 0.003** | 0       | 0.009   | -0.001  | -0.02** | -0.003  | 0.001  | 0      | 0.003   | 0.01   | 0.007   | 0.002*              | -0.007     | -0.004               |
| 07DB001 /S26 | 0.007  | 0.005   | -0.002  | -0.262* | -0.312  | -0.508  | -0.081  | 0.01   | 0.084  | 0.121   | 0.111  | 0.039** | 0.042***            | -0.286**   | -0.236               |
| 07DC001 /S27 | 0.03   | -0.015  | 0.016   | -0.332  | -0.455  | -0.231  | -0.05   | 0.051  | 0.363  | 0.221   | -0.07  | 0.195*  | 0.148***            | -0.188     | 0.064                |
| 07DD001 /S46 | 7.619  | 5.139   | 4.585   | 2.721   | 13.177  | -46.608 | 116.915 | 61.269 | 61.392 | 43.12** | 26.333 | 17.58** | 9.272               | 37.977     | 61.651               |
| 07DD002      | N/A    | N/A     | 0       | -0.054  | -0.027  | -0.033  | 0.008   | 0.06   | 0.089  | 0.062   | N/A    | N/A     | 0.004               | 0.017      | 0.002                |

**Table S12:** Mann-Kendall Trend Analysis of the Lower ARB streamflow for the period of 1981 – 2020. Cells highlighted in red represent insufficient data for a robust analysis. The statistically significant slopes are marked by stars: (\* = 90%), (\*\* = 95%), (\*\*\* = 99%).

| Stations     | Jan     | Feb     | Mar    | Apr    | May    | Jun    | Jul    | Aug    | Sep     | Oct    | Nov     | Dec      | Cold Season Average | Annual Avg | Open Warm Season Avg |
|--------------|---------|---------|--------|--------|--------|--------|--------|--------|---------|--------|---------|----------|---------------------|------------|----------------------|
| 07CD004      | 0.004   | 0.003   | 0.003  | 0.009  | 0.002  | -0.006 | 0.001  | 0.03   | 0.03    | 0.016  | 0.013   | 0.009    | 0.002               | 0.022      | 0.025                |
| 07DA006 /S38 | 0.004   | 0.002   | 0      | -0.017 | -0.012 | 0.071  | 0.096  | 0.058  | 0.099*  | 0.062  | 0.031   | 0.017**  | 0.01**              | 0.017      | 0.058                |
| 07DA008 /S7  | 0.002   | 0.002   | -0.002 | -0.026 | -0.059 | -0.031 | 0.019  | -0.009 | 0.004   | -0.006 | 0.001   | 0.006    | 0.006               | -0.035     | -0.024               |
| 07DA018 /S39 | 0.002*  | 0.002** | 0      | 0.005  | -0.001 | -0.008 | 0.003  | 0.003  | 0.005   | 0.004  | 0.007** | 0.003**  | 0.002***            | 0          | 0.002                |
| 07DB001 /S26 | 0.017** | 0.005   | 0.001  | -0.15  | -0.227 | -0.03  | 0.173  | 0.148  | 0.196*  | 0.168* | 0.081** | 0.032*** | 0.035***            | -0.065     | 0.008                |
| 07DC001 /S27 | 0.081** | 0.056   | 0.03   | -0.143 | -0.133 | 0.152  | 0.242  | 0.174  | 0.508** | 0.361* | 0.125   | 0.146*** | 0.123***            | 0.078      | 0.24                 |
| 07DD001 /S46 | 7.619   | 5.139   | 4.585  | 2.721  | 10.479 | 6.56   | 6.933  | 4      | 6.207   | 6.105  | 26.333  | 17.581** | 9.272               | -3.48      | 5.971                |
| 07DD002      | 0.533*  | 0.567*  | 0.026  | 0.016  | -0.012 | 0.027  | 0.07** | 0.09** | 0.14*** | 0.1**  | 0.75**  | 0.75**   | 0.04*               | 0.091**    | 0.064*               |

**Table S13:** Mann-Kendall Trend Analysis of the Lower ARB streamflow for the period of 1976 – 2020. Cells highlighted in red represent insufficient data for a robust analysis. The statistically significant slopes are marked by stars: (\* = 90%), (\*\* = 95%), (\*\*\* = 99%).

| Stations     | Jan      | Feb      | Mar     | Apr    | May    | Jun    | Jul    | Aug    | Sep    | Oct    | Nov    | Dec      | Cold Season Average | Annual Avg | Open Warm Season Avg |
|--------------|----------|----------|---------|--------|--------|--------|--------|--------|--------|--------|--------|----------|---------------------|------------|----------------------|
| 07CD004      | 0        | 0.002    | 0.002   | -0.013 | 0.001  | 0.005  | 0.02   | -0.002 | -0.002 | -0.009 | 0      | 0.005    | -0.002              | 0.012      | -0.003               |
| 07DA006 /S38 | 0.003    | 0.001    | 0.001   | -0.013 | 0.055  | 0.111  | 0.15** | 0.031  | 0.036  | 0.012  | 0.016  | 0.013*** | 0.005               | 0.037      | 0.057                |
| 07DA008 /S7  | 0.001    | 0        | -0.001  | -0.018 | -0.017 | 0.028  | 0.06   | -0.016 | -0.027 | -0.044 | -0.018 | 0.003    | 0.001               | -0.019     | -0.02                |
| 07DA018 /S39 | 0.002**  | 0.002*** | 0.001*  | -0.001 | 0.002  | -0.002 | 0.004  | -0.001 | -0.002 | 0      | 0.003  | 0.003*** | 0.001***            | -0.002     | -0.003               |
| 07DB001 /S26 | 0.015*** | 0.003    | 0.003   | -0.13  | 0.007  | 0.089  | 0.283* | 0.121  | 0.088  | 0.053  | 0.057* | 0.026*** | 0.027***            | -0.007     | 0.006                |
| 07DC001 /S27 | 0.044**  | 0.047*   | 0.029   | -0.116 | 0.096  | 0.219  | 0.317* | 0.112  | 0.266  | 0.159  | 0.165  | 0.093*** | 0.1***              | 0.129      | 0.216*               |
| 07DD001 /S46 | 4.787    | 2.199    | 1.855** | -4.74  | 4.211  | 2.431  | 2.62   | -3.039 | -6.306 | -2.304 | 4.457  | 17.581** | 0.734               | -8.16**    | -2.281               |
| 07DD002      | 0.038    | 0.1      | 0.035*  | 0.004  | 0.011  | 0.025  | 0.053* | 0.058  | 0.09** | 0.058* | 0.171  | 0.15     | 0.036**             | 0.087***   | 0.049                |

**Table S14:** Mann-Kendall Trend Analysis of the Lower ARB streamflow for the period of 1971 – 2020. Cells highlighted in red represent insufficient data for a robust analysis. The statistically significant slopes are marked by stars: (\* = 90%), (\*\* = 95%), (\*\*\* = 99%).

| Stations     | Jan      | Feb      | Mar     | Apr     | May    | Jun    | Jul    | Aug    | Sep    | Oct    | Nov    | Dec      | Cold Season Average | Annual Avg | Open Warm Season Avg |
|--------------|----------|----------|---------|---------|--------|--------|--------|--------|--------|--------|--------|----------|---------------------|------------|----------------------|
| 07CD004      | -0.004*  | 0        | 0.001   | -0.03   | -0.043 | -0.007 | -0.004 | -0.006 | -0.006 | -0.015 | -0.007 | -0.001   | -0.006**            | 0.003      | -0.024               |
| 07DA006 /S38 | 0.001    | -0.001   | 0       | -0.019  | 0.032  | 0.071  | 0.109  | 0.002  | 0.011  | -0.002 | 0.012  | 0.007*   | 0.001               | 0.044      | 0.04                 |
| 07DA008 /S7  | 0        | -0.001   | -0.001  | -0.036  | -0.037 | 0.011  | 0.027  | -0.018 | -0.025 | -0.042 | -0.015 | 0.002    | 0                   | -0.039     | -0.043               |
| 07DA018 /S39 | 0.002**  | 0.002*** | 0.001*  | -0.001  | 0.002  | -0.002 | 0.004  | -0.001 | -0.002 | -0.001 | 0.002  | 0.002*** | 0.001**             | -0.001     | -0.003               |
| 07DB001 /S26 | 0.015*** | 0.003    | 0.003   | -0.182* | -0.119 | -0.014 | 0.12   | 0.045  | 0.072  | 0.039  | 0.039  | 0.018**  | 0.016*              | -0.052     | -0.038               |
| 07DC001 /S27 | 0.041**  | 0.03*    | 0.028*  | -0.085  | 0.122  | 0.125  | 0.135  | 0.017  | 0.188  | 0.068  | 0.093  | 0.072**  | 0.073***            | 0.159*     | 0.15                 |
| 07DD001 /S46 | 0.435    | 0.318    | 0.274   | -0.93   | -0.292 | -0.407 | -6.291 | -3.001 | -2.256 | -0.224 | 0.589  | 1.307    | 0.159               | -2.893     | -2.92                |
| 07DD002      | 0.026    | 0.075    | 0.04*** | 0.019   | 0.011  | 0.015  | 0.018  | 0.031  | 0.07** | 0.041  | -0.152 | 0.023    | 0.024**             | 0.073***   | 0.027                |

**Table S15:** Mann-Kendall Trend Analysis of the Lower ARB streamflow for the period of 1955 – 2020. Cells highlighted in red represent insufficient data for a robust analysis. The statistically significant slopes are marked by stars: (\* = 90%), (\*\* = 95%), (\*\*\* = 99%).

| Stations     | Jan      | Feb      | Mar      | Apr     | May    | Jun    | Jul    | Aug    | Sep    | Oct    | Nov    | Dec      | Cold Season Average | Annual Avg | Open Warm Season Avg |
|--------------|----------|----------|----------|---------|--------|--------|--------|--------|--------|--------|--------|----------|---------------------|------------|----------------------|
| 07CD004      | -0.003   | 0        | 0.001    | -0.04*  | -0.074 | -0.011 | -0.008 | -0.009 | -0.009 | -0.03* | -0.013 | -0.003   | -0.007**            | -0.022     | -0.034               |
| 07DA006 /S38 | 0.001    | -0.001   | 0        | -0.019  | 0.032  | 0.071  | 0.109  | 0.002  | 0.011  | -0.002 | 0.012  | 0.007*   | 0.001               | 0.044      | 0.04                 |
| 07DA008 /S7  | 0        | -0.001   | -0.001   | -0.036  | -0.037 | 0.011  | 0.027  | -0.018 | -0.025 | -0.042 | -0.015 | 0.002    | 0                   | -0.039     | -0.043               |
| 07DA018 /S39 | 0.002**  | 0.002*** | 0.001*   | -0.001  | 0.002  | -0.002 | 0.004  | -0.001 | -0.002 | -0.001 | 0.002  | 0.002*** | 0.001**             | -0.001     | -0.003               |
| 07DB001 /S26 | 0.015*** | 0.003    | 0.003    | -0.182* | -0.119 | -0.014 | 0.12   | 0.045  | 0.072  | 0.039  | 0.039  | 0.018**  | 0.016*              | -0.052     | -0.038               |
| 07DC001 /S27 | 0.041**  | 0.03*    | 0.028*   | -0.085  | 0.122  | 0.125  | 0.135  | 0.017  | 0.188  | 0.068  | 0.093  | 0.072**  | 0.073***            | 0.159*     | 0.15                 |
| 07DD001 /S46 | 0.435    | 0.318    | 0.274    | -0.93   | -0.292 | -0.407 | -6.291 | -3.001 | -2.256 | -0.224 | 0.589  | 1.307    | 0.159               | -2.893     | -2.92                |
| 07DD002      | 0.026    | 0.075    | 0.036*** | 0.019   | 0.011  | 0.01   | 0.015  | 0.033  | 0.07** | 0.038  | -0.22* | -0.04    | 0.02                | 0.066***   | 0.028                |
